# Supplementary material for: RhoH GTPase recruits and activates Zap70 required for T cell receptor signaling and thymocyte development
Source: Springer Nature journal article supplement (doi:10.1038/ni1396), 2006-10-08
Supplement: ni1396-S7.pdf [file ni1396-S7.pdf]

## SUPPLEMENTARY METHODS

The following primers were used for semiquantitative PCR analysis of *TCRb* VDJC and *CD3e* cDNAs: V $\beta$ 8 LV-5' and C $\beta$ 2A-3', D $\beta$ 2-5' and C $\beta$ 2B-3'<sup>1</sup>, *CD3e* primer pairs<sup>2</sup> and hypoxanthine phosphoribosyltransferase (HPRT) primer pairs<sup>3</sup>.

## REFERENCES

1. Anderson, S. J., Abraham, K. M., Nakayama, T., Singer, A. & Perlmutter, R. M. Inhibition of T-cell receptor beta-chain gene rearrangement by overexpression of the non-receptor protein tyrosine kinase p56lck. *Embo J* **11**, 4877-86 (1992).
2. Nutt, S. L., Heavey, B., Rolink, A. G. & Busslinger, M. Commitment to the B-lymphoid lineage depends on the transcription factor Pax5. *Nature* **401**, 556-62 (1999).
3. Keller, G., Kennedy, M., Papayannopoulou, T. & Wiles, M. V. Hematopoietic commitment during embryonic stem cell differentiation in culture. *Mol Cell Biol* **13:1**, 473-486 (1993).
